# Supplementary material
Source: publisher site journal article supplement (https://www.spandidos-publications.com/2990/downloadSupplementary)
Supplement: Supplementary file 1 [file downloadSupplementary]

Figure S1. Survival rates of patients with lung cancer using The Cancer Genome Atlas Pan-Lung Cancer database (1,144 samples) were analyzed on the cBioPortal website. ANXA4, annexin 4; SOD2, superoxide dismutase 2.

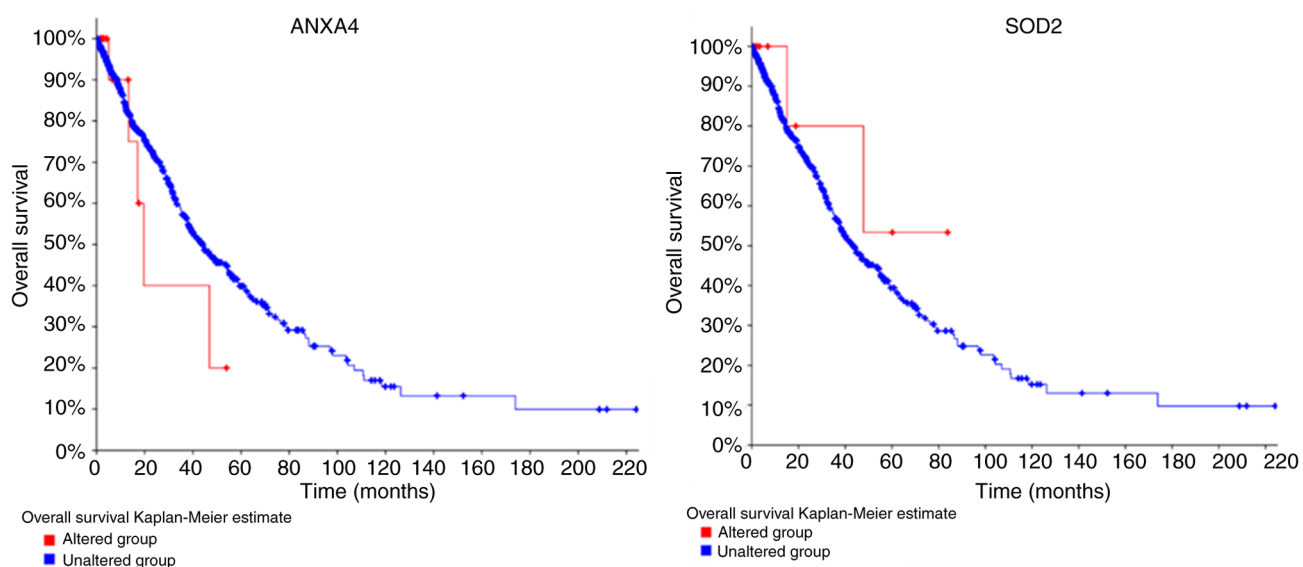

|       |                 | Number of cases total | Number of cases deceased | Median months survival | Logrank test p-value |
|-------|-----------------|-----------------------|--------------------------|------------------------|----------------------|
| ANXA4 | Altered group   | 17                    | 5                        | 19.50                  | 0.326                |
|       | Unaltered group | 937                   | 267                      | 43.91                  |                      |
| SOD2  | Altered group   | 12                    | 2                        | NA                     | 0.388                |
|       | Unaltered group | 942                   | 270                      | 43.26                  |                      |
